# Supplementary material for: Using spatial Markovian chain for the statistical analysis of seismic occurrences in the Azores Region
Source: Copernicus journal article supplement (doi:10.5194/nhess-2016-113), 2016-05-13
Supplement: Supplementary file [file nhess-2016-113-RC1-supplement.pdf]

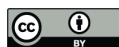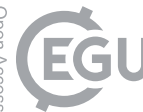

1   **Title:** Using spatial Markovian chain for the statistical analysis of seismic occurrences  
2   in the Azores Region

3

4   **Authors:**     Maria Cecília M. Rodrigues  
5                    Faculdade de Ciências e Tecnologia, Universidade Nova de Lisboa.  
6                    2829-516 Caparica, Portugal  
7                    mcmr@fct.unl.pt  
8                    Telephone: +351 212 948 300  
9                    Fax: +351 212 954 461

10

11                   Carlos S. Oliveira  
12                   Instituto Superior Técnico, Universidade de Lisboa.  
13                   Av. Rovisco Pais, 1  
14                   1049-001 Lisboa  
15                   csoliv@civil.ist.utl.pt  
16                   Tel: (+351) 218 417 000  
17                   Fax: (+351) 218 499 242

18

19   **Correspondence to:** Cecília Rodrigues (mcmr@fct.unl.pt)

20

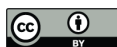

21    **Abstract**

22    The objective of this paper is to study the spatial sequence of the epicentral locations of  
23    seismic occurrences (Space variable) in the Azores region. In a previous investigation  
24    based on geological considerations and statistical criteria that addresses the existing  
25    historical and instrumental information, the epicentral locations were assigned to seven  
26    seismic zones.

27    This paper focuses on the analysis of occurrences in the seven seismic zones using  
28    Markovian chains.

29    The probability of occurrence of an earthquake in one of the seven adopted zones is  
30    estimated, revealing great differences among the seismic zones.

31    Additionally, the one-step transitions of this variable (seismic zone for the next  
32    occurrence in time) are explored and show an evident dependence between consecutive  
33    earthquake locations. Assuming that the process is stationary, N-step transitions are also  
34    discussed. Based on the developed Markovian model, this study also simulates the  
35    sequence of epicentral zones where occurrences can take place, which is an important  
36    component of modelling the entire process of seismic occurrences in the Azores region.

37

38

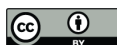

39

## 40 **1 Introduction**

41 The aim of this study is to estimate the probability of occurrence of an earthquake in  
42 each of the seven distinct seismic zones in the Azores region (as explained later) based  
43 on the existing historical and instrumental information and also on geological data with  
44 special emphasis on spatial location “memory”. This goal also includes evaluation of  
45 the influence of the location of an earthquake on the location of the next earthquake,  
46 i.e., the first order (or one-step) dependence of the Space variable. N-step transitions are  
47 also analyzed, and Markovian chains are applied for this purpose.

48 This study also simulates the sequence of epicentral seismic zones where occurrences  
49 can take place, which is an important component of the entire process of seismic  
50 occurrences in the Azores region and a topic of ongoing study.

51 Traditionally, seismic phenomena have been described using Poisson models, but these  
52 models do not have “memory”, a fact that contradicts the reality.

53 After an earthquake, it is common to ask where the next earthquake will occur. This  
54 study attempts to give a statistically sound answer to this question.

55 The Azores Archipelago is renowned due its intense seismicity, a characteristic that can  
56 be explained by its location at the triple junction of the Mid-Atlantic Rift, where the  
57 Eurasian, Nubian, and American Plates meet. The consequent seismic activity in this  
58 region is the result of the existence of active complex geological structures such as rifts,  
59 trenches, volcanoes, banks and faults.

60 This intense seismic activity has been studied by several authors, including Bezzeghoud  
61 [et al.](#) (2008), Borges [et al.](#) (2008), Carvalho [et al.](#) (2001) and Nunes [et al.](#) (2000). Other  
62 authors such as Kagan [et al.](#) (2010) and Reiter (1991) also studied this particular region.



63  The Azores Archipelago consists of nine islands distributed among three different  
64 groups: the islands of Flores and Corvo, which constitute the Western Group; the  
65 islands of Terceira, Graciosa, São Jorge, Faial and Pico, which are components of the  
66 Central Group; and the islands of São Miguel and Santa Maria that form the Eastern  
67 Group.

68 Modelling of natural phenomena, especially seismic processes, is a complex task that  
69 has been attempted by several authors in different areas of the world. As examples,  
70 Nanjo et al. (2011) presented selected models for Japan that are still undergoing testing  
71 and development. Other authors focused on tectonic aspects, such as Burford et al.  
72 (2000), who built a 3-D subsurface model, and still others have focused on prediction of  
73 damages caused by earthquakes (Sopra and Patrizi 1987) to better understand  
74 consequences to building .

75 Other models appeal to “memory”  such as Markovian models, but these models have  
76 not experienced great development. Kirimidjien and Anagnos (1984) first attempted to  
77 implement such models in the framework of California, but these studies were restricted  
78 to the same seismic region, and the results obtained were never transposed to practice.  
79 Memory is present in several natural phenomena and is an important aspect in  
80 simulation of natural processes that are not independent. For example, Russo and Soares  
81 (2014) used conditional space simulations in the context of urban air pollution  
82 forecasting.

83 Recently, Cavers and Vasudevan (2015) presented a space-time Markovian chain to  
84 represent a global model for earthquakes sequences. These researchers recognized that  
85 the sequence of epicenters has “memory”, and this fact is of fundamental importance.

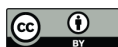

86 We aim to estimate the probability of earthquake occurrence in a target seismic zone  
 87 using knowledge of the seismic zone of the previous event. The process can be repeated,  
 88 thus allowing the simulation of the sequence of seismic locations.

89 Cavers and Vasudevan (2015) used a different methodology for macro-earthquake  
 90 zonation (i.e., active continent, trenches, etc.,) and applied weights for the state-to-state  
 91 transition probabilities.

92 Each earthquake occurrence can be characterized by the three variables of Time, Size  
 93 and Space. The variable Time ( $Dt$ ) is defined by the time intervals between consecutive  
 94 events, the variable Size ( $S$ ) is the Richter magnitude ( $M_L$ ) associated with an  
 95 earthquake, and the Space variable ( $Sp$ ) represents the zone in which the epicenter of  
 96 the earthquake is located.

97 Rodrigues and Oliveira (2013) defined 7 distinct seismic zones in the Azores Region  
 98 based on statistical and geological information and verified that the magnitude and time  
 99 between consecutive earthquakes differ significantly among these seismic zones. Figure  
 100 1 shows the seven defined zones together with the epicenter locations.

101

102

103

104

105

106

107

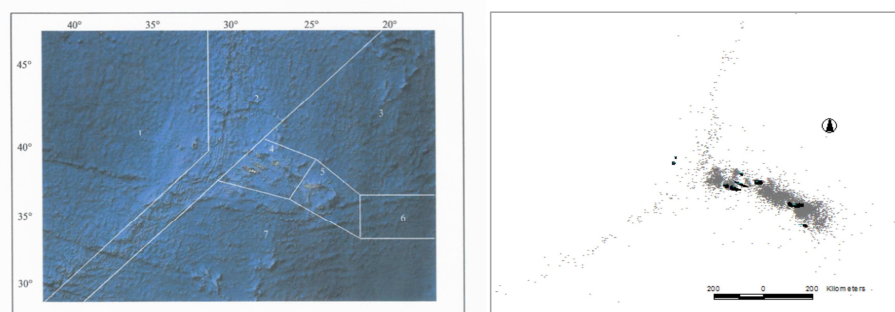

108 **Fig. 1** (a) Schematic representation of the 7 defined seismic zones proposed by  
 109 Rodrigues and Oliveira (2013), (b) Epicentral locations.

110



111 This 7-zone definition is adopted in this work, and the Space variable is represented as  
 112  $Sp \in \{1, 2, 3, 4, 5, 6, 7\}$ .

113

## 114 **2 Data**

115 For the Azores region, the available data are collected from two different sources. The  
 116 catalogue of Nunes et al. (2004) is the source of data for the period 1915-1998, and for  
 117 the period 1999-2011, the data are directly obtained from the site of Instituto Português  
 118 do Mar e da Atmosfera (I.P.M.A. - 2011).

119 The first period covers the area encompassed by longitude  $11.50^\circ$  W –  $42.86^\circ$  W and  
 120 latitude  $10.80^\circ$  N –  $47.54^\circ$  N. A total of 9214 records are available, of which 5456  
 121 contain information on magnitude according to the Richter scale ( $M_L$ ).

122 The catalogue of the second period covers an area delimited by longitude  $21.31^\circ$  W –  
 123  $35.42^\circ$  W and latitude  $34.3^\circ$  N –  $45.57^\circ$  N containing 9608 events, all of which contain  
 124 magnitude information ( $M_L$ ).

125 A total of 18822 seismic records are available with information on Time and Space,  
 126 15064 of which contain information on magnitude according to the Richter scale.

127  data are not constrained to “completeness of data for the low magnitude values” or to  
 128 “filtration of aftershocks”.

129

## 130 **3 Methodology**

131 The current study is performed in the following stages:

- 132 1. The Space variable is characterized among the seven defined seismic zones,  
 133 and the main statistics of  $Sp$  are determined.
- 134 2. The “memory” effect is analyzed. The influence of the seismic zone of an  
 135 earthquake in the location (seismic zone) on the next seismic event is quantified



136 by estimating the conditioned probability of occurrence of an event in each one  
 137 of the seven seismic zones and knowing the location of the epicenter (seismic  
 138 zone) of the last occurrence. This step includes the definition of seven statistical  
 139 conditioned distributions:

$$140 \quad P [ Sp_{t+1} = i | Sp_t = 1 ],$$

$$141 \quad P [ Sp_{t+1} = i | Sp_t = 2 ],$$

$$142 \quad P [ Sp_{t+1} = i | Sp_t = 3 ],$$

$$143 \quad P [ Sp_{t+1} = i | Sp_t = 4 ],$$

$$144 \quad P [ Sp_{t+1} = i | Sp_t = 5 ],$$

$$145 \quad P [ Sp_{t+1} = i | Sp_t = 6 ],$$

$$146 \quad P [ Sp_{t+1} = i | Sp_t = 7 ], \quad i \in \{1, 2, 3, 4, 5, 6, 7\}.$$

147 These formulations represent the “one-step” transition probabilities. The “N-  
 148 step” transitions are also referred.

149 3. Assuming that the sequence of epicentral locations is stationary in time, a  
 150 simulation model for the Space sequence is built and generated according to the  
 151 corresponding  $P [ Sp_{t+1} = j | Sp_t = i ], i, j \in \{1, 2, 3, 4, 5, 6, 7\}$ .

152 To evaluate the quality of the generated Space sequence, samples of generated  
 153 sequences are compared with the Space data using goodness-of-fit statistical  
 154 tests.

155

156 This methodology is a component of an ongoing study for modelling the seismic  
 157 process of occurrences in the Azores region, and the main steps are represented in Fig.

158 2.

159

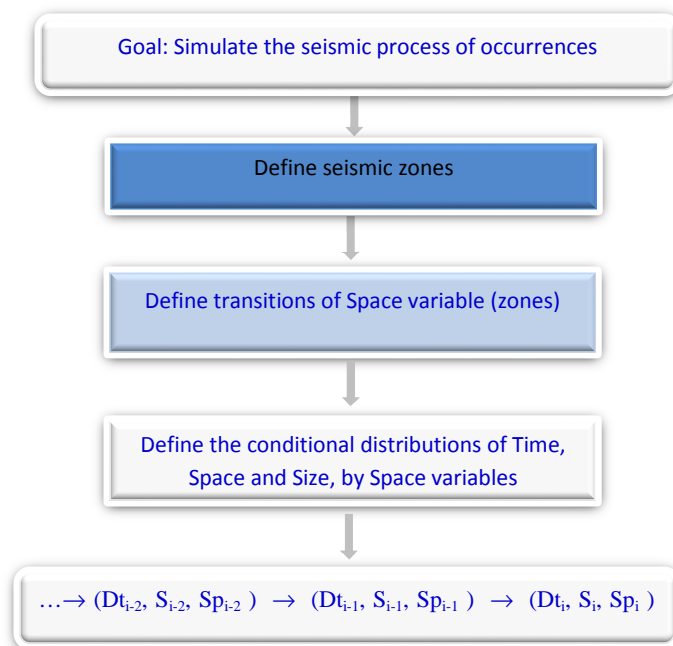

**Fig. 2** Schematic representation of the global process of occurrences. The dark blue box indicates previous achievements, the light blue box denotes the subject of this paper, and the white boxes portray work in progress.

The statistical software R® (see, e.g., Dalgaard 2008 or Venables et al. 2011) and the Turbo Pascal® language are used to implement the procedure described above.

## 4 Space data analysis

### 4.1 Space variable analysis

Based on the data, the main statistics of Sp are computed and presented in Table 1, and the corresponding histogram is shown in Fig. 3.





193

194 **Table 1.** Statistics of Sp

| Statistics of Sp        |        |
|-------------------------|--------|
| Mean                    | 4.38   |
| Standard deviation      | 1.02   |
| Skewness                | -1.35  |
| Kurtosis                | 4.55   |
| Minimum                 | 1      |
| quantile                |        |
| 0.1                     | 2      |
| 0.2                     | 4      |
| 0.3                     | 4      |
| 0.4                     | 4      |
| 0.5                     | 5      |
| 0.6                     | 5      |
| 0.7                     | 5      |
| 0.8                     | 5      |
| 0.9                     | 5      |
| 1 (max.)                | 7      |
| Total number of records | 18 822 |

195

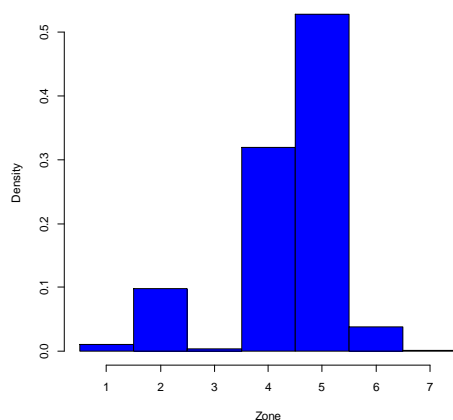

196

197 **Fig. 3** Histogram of Sp 

198

199 As shown, the frequency of seismic events in each one of the seven adopted zones is  
 200 quite different, highlighting the great dispersion of Sp among the seven zones.



201 Additionally, zones 1, 3 and 7 include small numbers of events compared with the other  
202 seismic zones, and for this reason, they are considered to be background zones of  
203 seismicity.

204 Zones 4 and 5 have the highest number of occurrences, followed by zone 2.

205 Zone 2 is a maritime zone corresponding to the Mid-Atlantic Ridge and its transform  
206 faults to the north. This zone also includes the North Azores Fracture Zone.

207 Zone 5 consists of the Eastern Group of the Archipelago, the Hirondele Trench, the D.  
208 João de Castro Bank and the two islands of São Miguel and Santa Maria.

209 Zone 4 encompasses the Central Group of the Archipelago west of Capelinhos and the  
210 Terceira Rift central sector with five islands.

211 Zone 6 is a maritime zone and includes the Gloria Fault to the East. The number of  
212 seismic events is moderate, but this zone has the highest magnitude of all zones:  $M_L 8.2$ .

213 The number of seismic events is not high but the magnitudes can be high. (For details  
214 on these morphological structures, see Madeira et al., 2015).

215

#### 216 **4.2 One-step transitions of space variable analysis**

217 It is known that the zone of an epicenter might constrain the zone of the next earthquake  
218 (see for example, Cavers and Vasudevan 2015).

219 The objective is to analyze the statistical distribution of the Space variable ( $S_p$ ) and the  
220 one-step transitions of this variable. If an earthquake takes place in a seismic zone, the  
221 aim is to answer the question: “which is likely to be the next seismic zone?”

222 Markovian chains are suitable for modelling this phenomenon (see, for example  
223 Ravindran et al. 1987).



224  The possible values of  $Sp$  are considered “states”, and each change of state is a  
 225 transition. The points in time at which the system is observed (in this case, the seismic  
 226 events) are the epochs.  
 227  $Sp_{t+1} = j$  signifies that at epoch  $t+1$ , an event took place in zone  $j$ , and  $Sp_t = i$  represents  
 228 that at epoch  $t$ , an event took place in zone  $i$ .  
 229 Let  $p_{ij}$  be the conditional probability  $P [ Sp_{t+1} = j | Sp_t = i ]$ , i.e., the one-step transition  
 230 probability,  $i, j \in \{1, 2, 3, 4, 5, 6, 7\}$ .  
 231 Based on the data, the one-step transition matrix  $T$  was computed for estimation of the  
 232 seven empirical conditioned distribution functions  $Sp_{t+1}|Sp_t = i$ ,  $i \in \{1, 2, 3, 4, 5, 6, 7\}$ .  
 233 Figures 4(a) to (g) display the corresponding histograms.

234

$$235 \quad T = \begin{bmatrix} 0.244 & 0.159 & 0.01 & 0.204 & 0.323 & 0.055 & 0.005 \\ 0.019 & 0.472 & 0.001 & 0.225 & 0.247 & 0.035 & 0.001 \\ 0.062 & 0.046 & 0.015 & 0.138 & 0.709 & 0.016 & 0.015 \\ 0.006 & 0.072 & 0.002 & 0.633 & 0.251 & 0.034 & 0.002 \\ 0.007 & 0.045 & 0.005 & 0.154 & 0.753 & 0.035 & 0.001 \\ 0.011 & 0.094 & 0 & 0.273 & 0.508 & 0.114 & 0 \\ 0 & 0.12 & 0.04 & 0.32 & 0.48 & 0.04 & 0 \end{bmatrix} \quad (1)$$

236 For example, Fig. 4(a) shows the probability of an earthquake occurring in each one of  
 237 the seven seismic zones knowing that the last earthquake took place in zone 1.

238

239

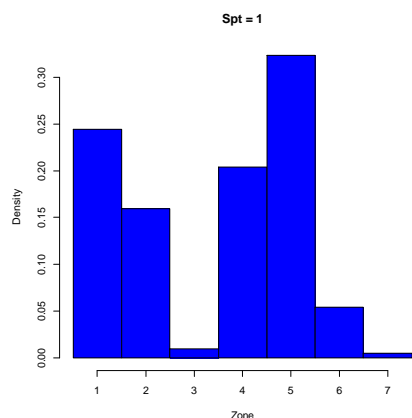

240

241 (a)

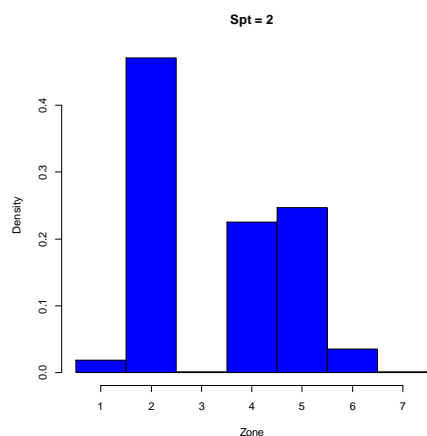

242

243 (b)

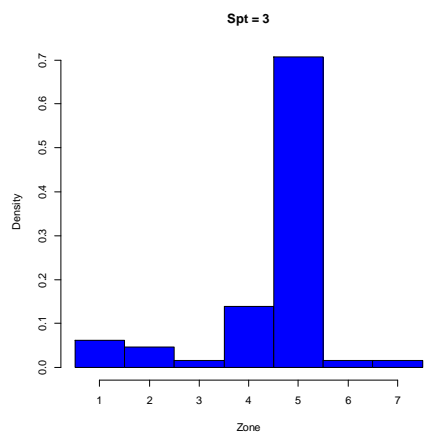

244

245 (c)

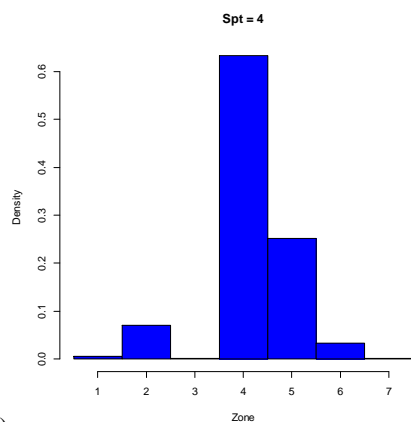

246 (d)

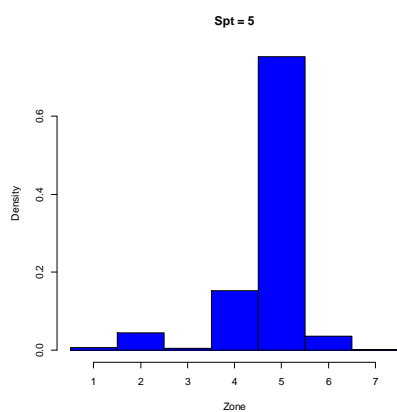

247

248 (e)

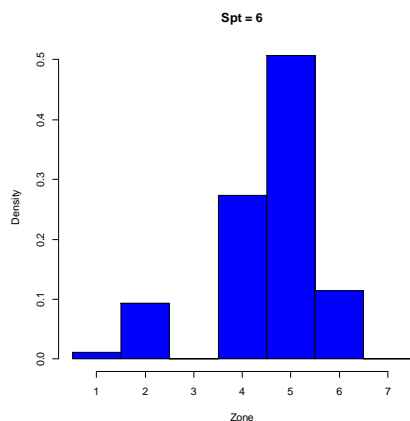

249

250 (f)

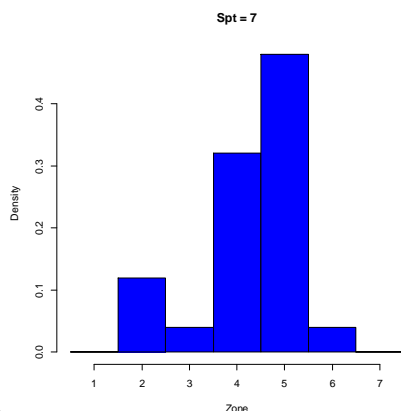

251 (g)

252 **Fig. 4** Histogram of: (a)  $Sp_{t+1}|Sp_t=1$ , (b)  $Sp_{t+1}|Sp_t=2$ , (c)  $Sp_{t+1}|Sp_t=3$ , (d)  $Sp_{t+1}|Sp_t=4$ , (e)  
 253  $Sp_{t+1}|Sp_t=5$ , (f)  $Sp_{t+1}|Sp_t=6$ , (g)  $Sp_{t+1}|Sp_t=7$ .

254

255 The seven conditioned distributions are highly different. The most similar to the  $Sp$   
 256 distribution function is the distribution of  $Sp_{t+1}|Sp_t=5$ , which is not surprising given that  
 257 zone 5 contains the greatest number of seismic occurrences.

258 If a seismic event occurs in zone 1, the most likely target zone is zone 5, which means  
 259 that the next earthquake will not be an aftershock. Zone 1 is a background zone with  
 260 few seismic events.

261 If a seismic event occurs in zone 2, the most likely target zone is the same zone, which  
 262 means that in zone 2, a great probability exists that the next earthquake will be an  
 263 aftershock.

264 If a seismic event occurs in zone 3, the most likely target zone is zone 5, which means  
 265 that the next earthquake will probably not be an aftershock. Zone 3 is a background  
 266 zone with a small number of earthquakes.

267 If a seismic event occurs in zone 4, the most likely target zone is the same zone. Again,  
 268 in zone 4, a great possibility exists that the next earthquake will be an aftershock.

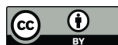

269 If a seismic event occurs in zone 5, the most probable target zone is the same zone.  
 270 Again, in zone 5, a great possibility exists that the next earthquake will be an  
 271 aftershock.  
 272 If a seismic event occurs in zone 6, the most likely target zone is zone 5, which signifies  
 273 that the next earthquake will probably not be an aftershock.  
 274 If a seismic event occurs in zone 7, the most likely target zone is zone 5, which signifies  
 275 that the next earthquake will probably not be an aftershock. Zone 7 is a background  
 276 zone with a small number of earthquakes.  
 277 Fig. 5 presents these data in the form of “arrows” and loops” or a scheme of the most  
 278 likely one-step transitions for each seismic zone.  
 279

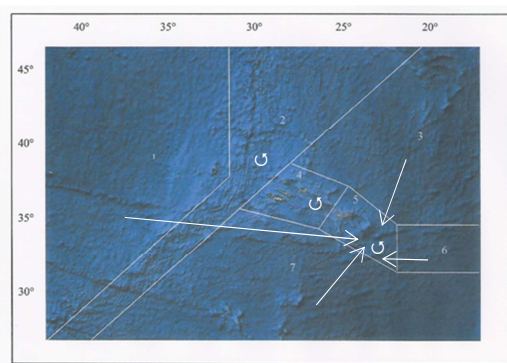

280  
 281 **Fig. 5** Scheme of the most likely one-step transitions for each seismic zone.

282  
 283 It can be noted that in zones with great number of occurrences (zones 2, 4 and 5), the  
 284 most probable case is that the next seismic event (event) will take place in the same  
 285 zone.  
 286 In zones with few earthquakes, the most probable case is that the next seismic event will  
 287 occur in a different zone because zones 1, 3, 6, and 7 are located far from the islands,  
 288 and if the aftershocks were weak, they might not be recorded.



289 These results show that the sequence of events is not independent of the preceding  
 290 earthquake.

291 We note that the current results represent only one-step transitions, and we must  
 292 quantify the N-step transitions.

293 We assume that the transition probabilities do not change with the passage of time. In  
 294 this situation, if we use Markovian chains to model the sequence of epicenters, the  
 295 Markovian chain will be stationary.

296 For a stationary Markovian chain, the matrix  $T$  creates the one-step transition  
 297 probabilities for any time and is sufficient to describe the entire process, i.e., the entire  
 298 sequence of epicentral seismic zones.

299 For example, if a seismic event has occurred in zone 2 at epoch  $t$ , i.e.,  $Sp_t = 2$ , and we  
 300 desire to estimate the probability of  $Sp_{t+2} = 5$ , this is a two-step transition,  $p_{ij}^{(2)}$ . Using  
 301 matrix  $T$ ,  $p_{52}^{(2)}$  can be computed.

302

$$303 \quad p_{52}^{(2)} = p_{51} \cdot p_{12} + p_{52} \cdot p_{22} + p_{53} \cdot p_{32} + p_{54} \cdot p_{42} + p_{55} \cdot p_{52} + p_{56} \cdot p_{62} + p_{57} \cdot p_{72} \quad (2)$$

304

305 By generalizing, it is possible to obtain the N-step transition matrix (see, for example,  
 306 Ravindran and Dolberg, 1987). Given that the Markovian chain is stationary:

$$307 \quad TM^{(n)} = TM^n. \quad (3)$$

308 This procedure allows reproduction of the seismic epicentral sequence.

309

## 310 **5 Space generation**

311 Space variables can be generated, i.e., a sample of values of the random variable can be  
 312 produced and compared with the data sample. First, the aim is to only test whether the  
 313 proportion of the number of generated events in each zone matches the corresponding





314 proportion in the data. Subsequently, the sequence of the generated sample must be  
 315 checked.

316

### 317 **5.1 Generation of Space variable**

318 The number of earthquakes in each seismic zone was computed based on the data,  
 319 allowing estimation of the probability of a seismic event occurring in each one of the  
 320 seismic zones.

321 The inverse-transform method and the statistical distribution function of Space were  
 322 used to generate pseudo-random values of Space (see, for example, Pidd (1994) or  
 323 Rubinstein and Melamed (1998)).

324 We use Spg as the random variable that represents the generated values of Space.

325 Table 2 shows the number of seismic events for each zone in the data and in mple of  
 326 size 19 000. Fig. 6 presents the histogram of Spg.

327

328 **Table 2** Number of generated seismic events for each seismic zone in the data and in a  
 329 generated sample.

| Zone   | 1   | 2    | 3  | 4    | 5    | 6   | 7  | Totals |
|--------|-----|------|----|------|------|-----|----|--------|
| Data   | 201 | 1847 | 65 | 6009 | 9948 | 727 | 25 | 18822  |
| Sample | 204 | 1892 | 60 | 6148 | 9953 | 730 | 13 | 19000  |

330

331 The generated sample and the data samples should exhibit the same features. A  
 332 goodness-of-fit test was used to check whether the generated random values of Space fit  
 333 the corresponding data values.

334

335

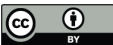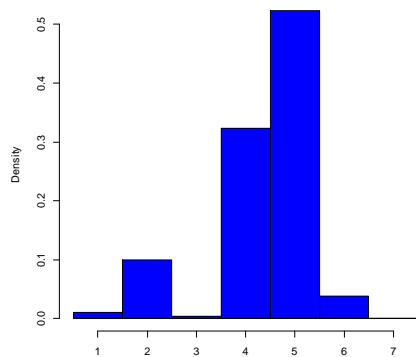

336  
337 **Fig. 6** Histogram of Space variable (Sp)

338  
339 The Chi-square test for two independent samples (see, e.g., Siegel and Castellan, 1988)  
340 was used to verify whether the samples formed by Sp and Spg can be considered to  
341 come from the same population. Table 3 summarizes the results obtained.

342  
343 **Table 3.** Summary of results obtained in the Chi-square two-sample test (Space  
344 variable).

| Chi-square two-sample test         |                  |
|------------------------------------|------------------|
| Test statistic                     | 5.31             |
| Critical value ( $\alpha = 0.05$ ) | 12.59            |
| Conclusion                         | Do not reject H0 |

345  
346 Therefore, it can be considered that Sp and Spg have the same distribution.

347  
348 **5.2 Generation of conditioned Space variable**

349 Given an initial value of Spg<sub>t</sub>, it is possible to generate the next value Spg<sub>t+1</sub> according  
350 to the respective conditioned distribution functions.

351 If the procedure is repeated, it generates a sample of pseudo-random values. Figure 7  
352 displays the flowchart for Space generation.

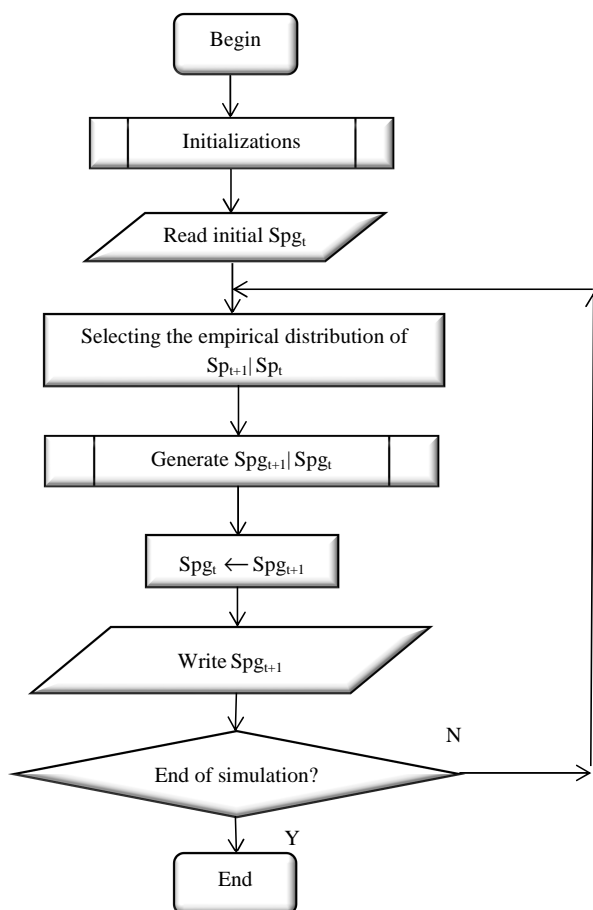

**Fig. 7** Flowchart of Space generation.

To check the first-order transitions of Space, a sample of data and the generated one-step transitions were compared.

Based on the generated sample (of size 19000), the number of one-step transitions of the variable Space was also generated, and the results are presented in the transition frequency matrix TG:



$$394 \quad TG = \begin{bmatrix} 72 & 27 & 3 & 42 & 79 & 9 & 0 \\ 41 & 999 & 3 & 432 & 455 & 54 & 2 \\ 5 & 5 & 2 & 11 & 38 & 3 & 3 \\ 35 & 433 & 10 & 3882 & 1515 & 207 & 6 \\ 73 & 444 & 50 & 1519 & 7466 & 357 & 8 \\ 6 & 73 & 0 & 197 & 354 & 63 & 0 \\ 0 & 4 & 0 & 6 & 9 & 0 & 0 \end{bmatrix} \quad (4)$$

395 The generated and data conditioned distribution functions must be compared, which  
 396 means comparison of 7 conditional distributions. The variables

$$397 \quad Sp_{t+1} | Sp_t = i \text{ and } Sp_{g_{t+1}} | Sp_{g_t} = i, \quad i = 1, 2, \dots, 7 \quad (5)$$

398 were compared using the Chi-square test for two independent samples (see, e.g., Siegel  
 399 and Castellan 1988). Table 4 condenses the results.

400

401 **Table 4.** Summary of results obtained in the Chi-square two-sample test (conditioned  
 402 distribution functions of Space).

403

| Samples compared                                       | Test statistic | C. V.<br>( $\alpha = 0.05$ ) | Conclusion |
|--------------------------------------------------------|----------------|------------------------------|------------|
| $Sp_{t+1}   Sp_t = 1$<br>$Sp_{g_{t+1}}   Sp_{g_t} = 1$ | 5.31           | 9.49                         | NR         |
| $Sp_{t+1}   Sp_t = 2$<br>$Sp_{g_{t+1}}   Sp_{g_t} = 2$ | 5.56           | 9.49                         | NR         |
| $Sp_{t+1}   Sp_t = 3$<br>$Sp_{g_{t+1}}   Sp_{g_t} = 3$ | 0.88           | 5.99                         | NR         |
| $Sp_{t+1}   Sp_t = 4$<br>$Sp_{g_{t+1}}   Sp_{g_t} = 4$ | 1.41           | 12.59                        | NR         |
| $Sp_{t+1}   Sp_t = 5$<br>$Sp_{g_{t+1}}   Sp_{g_t} = 5$ | 1.37           | 12.59                        | NR         |
| $Sp_{t+1}   Sp_t = 6$<br>$Sp_{g_{t+1}}   Sp_{g_t} = 6$ | 2.71           | 9.49                         | NR         |
| $Sp_{t+1}   Sp_t = 7$<br>$Sp_{g_{t+1}}   Sp_{g_t} = 7$ | 0.20           | 5.99                         | NR         |

404 C.V. = Critical value; NR= Do not reject  $H_0$ ; R = Reject  $H_0$ ;  
 405  
 406



407 According to the statistical tests, it can be assumed that one-step transitions in the  
 408 generated sample fit the one-step transitions in the data.

409 Assuming that the sequence of epicenters is stationary in time (which makes sense, in  
 410 our opinion), it is possible to properly generate the entire sequence using the one-step  
 411 transition matrix.

412 As an example, the matrixes of the second and sixth order are presented below. Note  
 413 that in the 6<sup>th</sup> order matrix, the columns are nearly equal. As anticipated, the transition  
 414 matrices are expected to have equal columns when the order increases, and each line  
 415 tends to be equal to the Space distribution function.

416

$$417 \quad T^{(2)} = T^2 = \begin{bmatrix} 0.07 & 0.149 & 0.005 & 0.282 & 0.500 & 0.044 & 0.002 \\ 0.017 & 0.257 & 0.002 & 0.301 & 0.384 & 0.038 & 0.001 \\ 0.023 & 0.078 & 0.005 & 0.231 & 0.626 & 0.037 & 0.002 \\ 0.009 & 0.095 & 0.003 & 0.467 & 0.387 & 0.037 & 0.002 \\ 0.009 & 0.071 & 0.004 & 0.236 & 0.641 & 0.038 & 0.001 \\ 0.011 & 0.099 & 0.003 & 0.306 & 0.536 & 0.044 & 0.001 \\ 0.010 & 0.107 & 0.004 & 0.320 & 0.520 & 0.037 & 0.002 \end{bmatrix} \quad (6)$$

418 This result means that the seismic process of occurrences loses “memory” with time.

419 After several events, the probability of an occurrence among the seismic zones is nearly  
 420 independent of the location of a far event.

421

$$422 \quad T^{(6)} = T^6 = \begin{bmatrix} 0.011 & 0.102 & 0.004 & 0.320 & 0.525 & 0.038 & 0.001 \\ 0.011 & 0.105 & 0.004 & 0.323 & 0.519 & 0.038 & 0.001 \\ 0.011 & 0.098 & 0.004 & 0.314 & 0.535 & 0.037 & 0.001 \\ 0.011 & 0.100 & 0.004 & 0.327 & 0.519 & 0.038 & 0.001 \\ 0.011 & 0.097 & 0.004 & 0.314 & 0.536 & 0.038 & 0.001 \\ 0.011 & 0.099 & 0.004 & 0.318 & 0.529 & 0.038 & 0.001 \\ 0.011 & 0.099 & 0.004 & 0.319 & 0.528 & 0.038 & 0.001 \end{bmatrix} \quad (7)$$



423

## 424 **6 Conclusions**

425 In this work, the sequence of Space locations of the epicenters (seismic zones) in the  
426 Azores region was analyzed. The seismic zones were defined in a previous study  
427 (Rodrigues and Oliveira 2013), and based on the existing historical and instrumental  
428 information, this paper focuses on the analysis of the Space variable using Markovian  
429 chains. The one-step transitions of this variable were explored and showed an evident  
430 dependence on consecutive earthquake locations.

431 It can be noted that in zones with greater number of occurrences, (zones 2, 4 and 5) the  
432 most probable event is that the next seismic event will take place in the same zone. The  
433 next event should be an aftershock. In zones with few earthquakes, the most probable  
434 event is that the next seismic event  will occur in a different zone. This observation can  
435 be explained because zones 1, 3, 6, and 7 are located far from the islands, and if the  
436 aftershocks were weak, they might not be recorded.

437 These results confirm that the spatial sequence of events is not independent of the  
438 preceding earthquakes.

439 These results make sense assuming that the transition probabilities do not change with  
440 time, i.e., the Markovian chain is stationary. With this assumption, it is possible to  
441 obtain the N-step transitions of Space, which allows estimation of the probability of  
442 occurrence of a seismic event in a specific zone based on the “recent seismological  
443 past”.

444 Using simulation techniques, the sequence of epicentral zones was reproduced. The  
445 current simulation is a component of ongoing work aimed at modelling the process of  
446 seismic occurrences in the Azores region. This project will include a visual computer  
447 simulation of the entire process of seismic occurrences in the Azores region.



448 The Markov chain developed here ~~in~~ can be easily exported to the analyses of time  
449 ~~e~~vents of other natural phenomena such as temperature, precipitation, etc.  
450

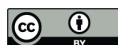

451

452 **References**

- 453 Bezzeghoud, M., Borges, J.F., Caldeira, B., Bufo, E., Udias, A.: Seismic Activity in  
 454 the Azores region in the context of the Western part of the Eurasia-Nubia Plate  
 455 boundary. Proc. International Seminar on Seismic Risk, Azores, Portugal, paper 7  
 456 (CDROM), 1-11, 2008.
- 457 Borges, J.F., Bezzeghoud, M., Caldeira, B., Bufo, E.: Recent seismic activity in the  
 458 Azores Region. Proc. International Seminar on Seismic Risk, Azores, Portugal: paper 8  
 459 (CDROM), 1-5, 2008.
- 460 Burford, D.J., Ger, L., Blake, E.H., Wit, M.J., Doucoré, C.M., Hart, R.: A seismic  
 461 modelling environment as a research and teaching tool for 3-D subsurface modelling.  
 462 Journal of Astronomy and Geophysics, 2: 69-77, 2000.
- 463 Carvalho, A., Sousa, M.L., Oliveira, C.S., Campos-Costa, A., Nunes, J.C., Forjaz, V.H.:  
 464 Seismic hazard for Central Group of the Azores Islands. Bull. Geofis. Teor. Appl., 42:  
 465 89-105, 2001.
- 466 Cavers, M., Vasudevan, K.: Spacio-Temporal Complex Markovian Chain (SCMC)  
 467 Model Using Directed Graphics: Earthquakes sequencing. Pure. Appl. Geophys., 172:  
 468 225-241, 2015.
- 469 Dalgaard, P.: Introductory Statistics with R. © Springer-Verlag, 2008.
- 470 I.P.M.A.: Instituto Português do Mar e da Atmosfera.  
 471 <http://www.ipma.pt/pt/sismologia/atividade/> Accessed in December 2011
- 472 Kagan, Y.Y., Bird, P., Jackson, D.D.: Earthquake Patterns in Diverse Tectonic Zones of  
 473 the Globe. Pure Appl. Geophys., 167: 721-741, 2010.



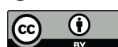

- 474 Kiriimidjien, A.S., Anagnos, T.: Stochastic Slip-Predictable Model for Earthquake  
 475 Occurrences. *Bulletin of Seismological Society of America*, 74(2): 739-755, 1984.
- 476 Madeira, J., Brum da Silveira, A., Hipólito, A., Carmo, R.: Active tectonics in the  
 477 central and eastern Azores islands along the Eurasia-Nubia boundary: a review. *In*  
 478 *Volcanic Geology of São Miguel Island (Azores Archipelago)*, edition JL Gaspar et al.  
 479 *The Geological Society Memoir no.44*, Chapter 3, 15-32, 2015.
- 480 Nanjo, K.Z., Tsuruoka, H., Hirata, N., Jordan, T.H.: Overview of the first earthquake  
 481 forecast testing experiment in Japan. *Earth Planets Space*, 63, 159-169, 2011.
- 482 Nunes, J.C., Forjaz, V.H., Oliveira, C.S.: Zonas de geração sísmica para o estudo da  
 483 casualidade do Grupo Central do Arquipélago dos Açores. PPERCAS Project, Report  
 484 3/2000, Azores University, Ponta Delgada, Portugal (in Portuguese), 2000.
- 485 Nunes, J.C., Forjaz, V.H., Oliveira, C.S.: Catálogo Sísmico da Região dos Açores.  
 486 Lisbon, Portugal, (CDROM) (in Portuguese), 2004.
- 487 Pidd, M.: *Computer Simulation in Management Science*. John Wiley & Sons, 1987.
- 488 Ravindran, A., Phillips, D.T., Dolberg, J.J.: *Operations Research principles and*  
 489 *practice*. John Wiley & Sons, 1987.
- 490 Reiter, L.: *Earthquake Hazard Analysis: Issues and Insights*. Columbia University Press,  
 491 1991.
- 492 Rodrigues, M.C.M., Oliveira, C.S.: Seismic Zones for Azores based on statistical  
 493 criteria. *Nat. Hazards Earth Syst. Sci.*, 13:9:2353-2367, doi:10.5194/nhess-13-2337,  
 494 2013.
- 495 Rubinstein, R. Y., Melamed B.: *Modern Simulation and Modeling*. John Wiley & Sons,  
 496 1998.



- 497 Russo, A., Soares, A.: Hybrid Model for Urban Air Pollution Forecasting: A Stochastic  
 498 Spatio-Temporal Approach. Math. Geosci., 46:75-93, 2014.
- 499 Siegel, S., Castellan, N.J.: Nonparametric Statistics for the Behavioral Sciences.  
 500 McGraw-Hill Co, 1988.
- 501 Sopra, L., Patrizi, G.: The application of OR technics for the prediction and  
 502 understanding of damages caused by seismic events. European Journal of Operational  
 503 Research, 28:180-195, 1987.
- 504 Venables, W.N., Smith, D.M. & R Development Core Team: An Introduction to R.  
 505 Notes on R: A Programming Environment for Data Analysis and Graphics. Springer-  
 506 Verlag, 2011.
- 507
- 508
- 509
- 510
- 511
